# Supplementary material for: Genetic Dissection of Panicle Morphology Traits in Super High-Yield Hybrid Rice Chaoyou 1000
Source: MDPI journal article supplement (doi:10.3390/plants13020179), 2024-01-09
Supplement: s1 [file s1]

Supplemental Table S1: Statistical descriptions of yield related traits in two population derived from Guangxiang 24S and R900

|                | Trait      | Parents             |                      | population           |                      |          |          |
|----------------|------------|---------------------|----------------------|----------------------|----------------------|----------|----------|
|                |            | Guangxiang24S       | R900                 |                      |                      |          |          |
|                |            | Mean±SD             | Mean±SD              | Mean±SD              | Range                | Kurtosis | Skewness |
| F <sub>2</sub> | <b>PN</b>  | 7.00±1.56           | 4.00±0.71            | 4.34±1.24            | 2.00-11.00           | 0.85     | 0.68     |
|                | <b>PL</b>  | 18.07±0.83 cm       | 22.04±0.76 cm        | 20.26±1.48 cm        | 16.60-24.45 cm       | -0.13    | 0.02     |
|                | <b>PBN</b> | 11.33±0.516         | 17.80±2.28           | 15.32±1.58           | 12.00-20.00          | -0.26    | 0.18     |
|                | <b>SBN</b> | 27.67±3.011         | 69.20±17.23          | 48.43±11.36          | 26.50-86.00          | 0.73     | 0.64     |
|                | <b>GN</b>  | 157.17±13.32        | 290.20±51.85         | 253.94±56.50         | 118.50-403.00        | -0.01    | 0.43     |
|                | <b>FGN</b> | 132.50±12.62        | 267.80±58.18         | 237.99±56.18         | 108.00-395.00        | 0.21     | 0.42     |
|                | <b>EGN</b> | 24.67±5.495         | 22.40±20.69          | 27.49±11.18          | 14.5-56.00           | 1.05     | 1.26     |
|                | <b>SSR</b> | 84.2%±3.2%          | 92%±8.1%             | 94.02%±4.32%         | 80%-99%              | 0.32     | -1.16    |
|                | <b>PSD</b> | 8.71±0.73<br>per cm | 13.21±2.56<br>per cm | 12.50±2.45<br>per cm | 5.23-19.44<br>per cm | 0.50     | 0.48     |
| F <sub>3</sub> | <b>PN</b>  | 9.25±3.49           | 5.92±2.16            | 8.89±2.15            | 5.470-20.250         | 0.46     | 0.72     |
|                | <b>PL</b>  | 23.90±0.94 cm       | 26.13±0.48 cm        | 27.04±1.84 cm        | 22.05-29.80 cm       | -0.12    | 0.19     |
|                | <b>PBN</b> | 12.25±0.96          | 18.50±1.29           | 15.90±1.53           | 12.25-20.00          | -0.28    | 0.43     |
|                | <b>SBN</b> | 50.25±5.97          | 84.50±6.56           | 73.38±12.59          | 39.00-113.33         | 0.16     | 0.60     |
|                | <b>GN</b>  | 235.00±35.64        | 390.25±26.09         | 347.07±60.92         | 209.67-532.00        | 0.02     | 0.53     |
|                | <b>FGN</b> | 15.4±4.98           | 258.50±25.96         | 245.72±58.38         | 42.67-398.75         | 0.60     | 0.28     |
|                | <b>EGN</b> | 182.75±47.97        | 131.75±25.90         | 101.36±57.99         | 13.00-395.00         | 0.88     | 0.83     |
|                | <b>SSR</b> | 6.78%±2.76%         | 66.28%±4.80%         | 72.42%±11.62%        | 31%-94%              | -0.02    | 0.46     |
|                | <b>PSD</b> | 9.82±1.10<br>per cm | 14.93±0.68<br>per cm | 12.86±2.22<br>per cm | 8.25-19.81<br>per cm | 0.32     | -0.64    |

SD: standard deviation; Trait: PL: panicle length; PN: panicle number per plant; PBN: primary branch number; SBN: secondary branch number; GN: grain number per panicle; FGN: filled grain number per panicle; EGN: empty grain number per panicle; SSR: seed setting rate; PSD: panicle setting density;

Supplemental Table S2: The physical positions and primer information of marker pairs

| Chr. | Marker Name | Physical Position (bp) | Primer Information           |                             |
|------|-------------|------------------------|------------------------------|-----------------------------|
|      |             |                        | Forward Primer               | Reverse Primer              |
| 1    | RM3252      | 319100                 | GGTAACTTTGTTCCCAT<br>GCC     | GGTCAATCATGCATGCAA<br>GC    |
|      | RM6786      | 7121400                | TTGACGATGGCAAGCTC<br>C       | GATTTCCGCAGCAAGTAT<br>CC    |
|      | RM583       | 8420150                | AGATCCATCCCTGTGGA<br>GAG     | GCGAACTCGCGTTGTAAT<br>C     |
|      | RM493       | 12557603               | TAGCTCCAACAGGATCG<br>ACC     | GTACGTAAACGCGGAAGG<br>TG    |
|      | STS         | 15282195               | ATGCTCTGTTTGGCTTAT<br>TTCACG | ATACAGTTCGTCCGCTAC<br>AGGC  |
|      | CM1-6       | 20278362               | GCCACTGCCAGGATCTG<br>TAA     | TCAAACATACTCGGTACT<br>TCTCA |
|      | CM1-9       | 26119472               | ATCCTTTGTCCCTCGTCG<br>TC     | TGTCCGTCCACTGATCAT<br>GT    |
|      | CM1-10      | 30289346               | CTTGAGACGTGCTGGTG<br>TG      | TCACTGGATCCACATGCC<br>AT    |
|      | RM8097      | 32464694               | TACATACACGTTTCATGT<br>GCC    | CGAGCGTAGGAAGACTAC<br>C     |
|      | CM1-19      | 34129535               | CGGATGGTCAAACGTTG<br>GAT     | AAAGAGTCCCCAGTTCCC<br>G     |
|      | CM1-31      | 40159465               | AGCCTCTCCAAATCGAA<br>CTCT    | ACATGTGGGTTCCTGTGT<br>CA    |
|      | STS         | 43348400               | GGGTCATATTTCTATTA<br>ATTC    | AAGGAAAATCCACCACTA<br>ATC   |
|      | RM6321      | 44042256               | GGCTCTACCTCGCTGTT<br>GTC     | ACGAATATAACCTGCGGC<br>AG    |
| 2    | CM2-2       | 54737                  | TTTTGGCCATGCAAAC<br>CCA      | TGCTACACATAGATCCCT<br>CGT   |
|      | CM2-3       | 2166682                | TCCGAAAACCCCTTCTG<br>ACA     | TGGGAGAGAGTGATGGAG<br>GA    |
|      | CM2-5       | 3964175                | GGAAACCAGGGACAAC<br>GAAC     | GGGAACGTGTGTGTGAAC<br>AA    |
|      | CM2-35      | 21342166               | GCTAAGAATCGAACGGG<br>TCAC    | ATGTGTTGAATCGAGCCG<br>TC    |
|      | CM2-12      | 25293066               | TCTCGTCGGTAATCTCG<br>TGA     | ACAAGATACGACATCAAG<br>CACA  |
|      | CM2-13      | 28641860               | AGCTCTTCAAAAGGCAA<br>GTCA    | CCGATGCATGACTTCCTTC<br>TG   |
|      | RM3763      | 29600800               | TCTCTGAACACACCCAC<br>ACC     | TGTTTTGATCTCAGCTCCC<br>C    |

|   |        |          |                             |                             |
|---|--------|----------|-----------------------------|-----------------------------|
| 3 | STS    | 30538814 | CCACAACACCAACGATG<br>CTA    | TAGGACTGACCCCTCTGC<br>AT    |
|   | STS    | 30925200 | GCATAGTTGAACCAGTA<br>GCATG  | GAAGTGGCAGAATTGAGT<br>GTC   |
|   | RM3316 | 32365700 | TTCGACGATTCTGTACA<br>CGC    | CATGATCCCAAATGCATG<br>GG    |
|   | CM2-37 | 35703922 | TCTACCACGTGCCAAAA<br>TACA   | GTCCATGATCCATCCAAG<br>CAC   |
|   | CM2-15 | 37682703 | TGAATCATGGTATGGAG<br>GCAC   | AGATCACTGATGGCACGT<br>CA    |
|   | CM3-25 | 2151293  | TCAGATCATCCAGCACA<br>GCA    | ATGAGGTAGAAGGGGCCA<br>AC    |
|   | CM3-23 | 5666302  | GCAAGAATTAGACAGG<br>AGTAGGT | GTGAGTTTCTACGTTGTGC<br>CA   |
|   | CM3-8  | 13108039 | ACTCCTTGCACACATCA<br>AACA   | TTATTGTGCTTATAAGGG<br>CTGCA |
|   | STS    | 16589300 | TGTTGTTTTGGAGATTTG<br>AAGG  | GAGGCGAAAAGTCACGTA<br>AGC   |
|   | CM3-11 | 18592767 | CAAGCTAGCTGGAGGAG<br>GAG    | AGATTTCTCCTCCCCAACC<br>G    |
|   | CM3-13 | 25808801 | TGCATTTCCCAATTCTG<br>AACCT  | CCTGTAGGTTGACTGTTG<br>CA    |
|   | CM3-16 | 31250982 | GCATTCATGTCTCTTTAG<br>GGTGT | GGCTCACCTCGTTTTACAT<br>ATCT |
|   | CM3-18 | 34893973 | GGCCTCTATATCCGCAA<br>GCA    | ATCTCGACTTCCTGCTCAC<br>C    |
|   | STS    | 352800   | AGAATAGAGTGCATCAT<br>CGTC   | AACCTGATAGGTGGAAGA<br>TGTAC |
| 4 | CM4-7  | 3945262  | GCCAATGAGATGAAGG<br>ACCC    | ACCAATGTGTGAAGAAGG<br>AGAT  |
|   | CM4-32 | 9460741  | CGGATTCAAACAGGGCC<br>ATT    | AATTAGCGCGGAATTGAC<br>GG    |
|   | CM4-15 | 12469155 | CAGTCACAGGCGATCAA<br>CAT    | TGCAGGACCGTGTAATCA<br>AC    |
|   | CM4-34 | 16820391 | TAAAACCCTCGTCCTTC<br>CCC    | TCAGCTGGCCACTAAAAT<br>GA    |
|   | CM4-19 | 19938120 | TGGTAGTTGTGTCTCAT<br>GTGC   | AACAGGTGTCATGAGCTC<br>CA    |
|   | CM4-21 | 22025422 | TCTGTTAGCATCCCTCC<br>ACT    | TCCCATGCATGCGACAAA<br>TT    |
|   | CM4-22 | 23799267 | GTCCCCGATATCTTGCA<br>GCT    | GCTGACGTGGCTTATTGA<br>CT    |
|   | RM3839 | 24155150 | AATGGGACCAGAAAGC<br>ACAC    | AAAAAGAGCATGGGGGCT<br>AC    |

|   |             |          |                             |                             |
|---|-------------|----------|-----------------------------|-----------------------------|
| 5 | CM4-25      | 27307764 | TTGGCGGCTTGGTGTAG<br>T      | AAATGCCGCCATCTATAC<br>AGT   |
|   | CM4-27      | 30155206 | TAGGTATGGATTGAGTG<br>GGTCT  | TTCGACTGAATGGGAATA<br>TGCT  |
|   | RM349       | 32971050 | TTGCCATTTCGCGTGGAG<br>GCG   | GTCCATCATCCCTATGGTC<br>G    |
|   | RM1113      | 34535150 | GGGCGCATGTGTATTTC<br>TTC    | TGGGGAAAAACCACAAGC<br>C     |
|   | CM4-29      | 35372209 | TGAAACATGAAACAAAT<br>CCGAGT | TGAAACAGCGCCCGATTG          |
|   | CM5-1       | 1969011  | GATGCCGGACAAGCTTG<br>AAT    | TGTTCCAAACTCCAAACA<br>TGCA  |
|   | CM5-4       | 3518668  | ACGAATGGTCAAACATG<br>TGAGA  | TGGAGTACTGTACGTTCT<br>CT    |
|   | CM5-5       | 6165831  | GTCTCTTTTGCACCGTG<br>ACC    | GCAAGGGCGTTAGTAGAA<br>TTTT  |
|   | CM5-12      | 18983377 | TGCCAATTGTAGGTGTT<br>GTGT   | CACTTGATGGGATTGCTT<br>GCT   |
|   | CM5-14      | 21885780 | AAATCCGTGGCCCTCCT<br>C      | ATAGGGGAGGGAGTGGTG<br>AT    |
|   | CM5-16      | 25003997 | ACATGGAGTAGCAATCG<br>ACCA   | TGCCTGTGGTTTTTCGTTAC<br>G   |
|   | CM5-17      | 27701004 | GTGCGGATTTCTCCTCTC<br>TC    | TGCCGGTCCATTTCTAGA<br>AG    |
|   | CM5-19      | 28837876 | TTGAAACCCCAGTAGCA<br>GCT    | AGCTGAGAGAGAAGAGG<br>GGA    |
|   | CM5-20      | 30147722 | CAAGCCAGAGTCGACGA<br>TTC    | TGCCACTCCAATCTCTCTC<br>TC   |
|   | CM5-21      | 31069576 | GGAGGGGTGGCCATGTA<br>TTA    | GCCGGCTTGCTGACTATT<br>AG    |
| 6 | CM6-18      | 50357    | CGGCCATGGTAGCTAGT<br>GTA    | CCCAGCTCAGATCATTG<br>GA     |
|   | CM6-19      | 2058467  | ATGCAATGTCAGGCGAA<br>ACT    | TGGTGGTTGAAATTGTTG<br>CAG   |
|   | RM217       | 4059800  | ATCGCAGCAATGCCTCG<br>TG     | TGCGTTTGTGTTTGGCTCG         |
|   | RM1971<br>5 | 7947000  | CCAATCTAAATTACGCC<br>GCTAGG | GCCAGCTGTTGTTTGTAGT<br>TTCG |
|   | CM6-21      | 10486154 | CATACGTGCCTGAGTTT<br>CCG    | TCTCTCTTTCCTGCCCTGT<br>T    |
|   | CM6-11      | 14064647 | ATCCTGATCCTTCCTTGC<br>CG    | TCGCTACTCAATCGACG<br>G      |
|   | CM6-13      | 15772370 | TGGCCCAGCAACTATCG<br>AG     | ATGTACCAAGAGCTTCGC<br>CT    |

|   |        |          |                              |                              |
|---|--------|----------|------------------------------|------------------------------|
| 7 | CM6-14 | 17528519 | CTTTTATCTCCATGGCCG<br>CC     | CTACTGTCGCACCTCCTTC<br>C     |
|   | CM6-26 | 20558014 | CACGCTGTGTCTTCCGTT<br>AA     | ATTGCTGTAGAGGCCTGG<br>TT     |
|   | CM6-28 | 22384871 | TAATTCACCACTTCCAC<br>CGC     | AGTGTTGTGATTTCAGG<br>GC      |
|   | STS    | 230388   | TATGTCCTTAGCATGGA<br>AGACC   | CGTTGTTGATCATCTGGTA<br>CG    |
|   | CM7-2  | 4570930  | TGAGGCTTGACTTGGAT<br>GGA     | CAAACGAAACGAACGCCA<br>AC     |
|   | STS    | 6071141  | TTCTTCCATGTAGCAAG<br>CATT    | CCTACTGCCTGCCAAATC<br>TAT    |
|   | CM7-10 | 8013115  | CACATGGACAAAACAA<br>AGGCA    | TGAACGGTCATGTATGGT<br>TTGA   |
|   | RM3755 | 14833204 | TGTGGACAACCTCAACT<br>GAAAGC  | CATAATCACCAACATCGG<br>AGAAGC |
|   | CM7-6  | 16779869 | AGCAAGCCGTCCTGTTC<br>TT      | CCGGTGATTTCGTCGTCAG          |
|   | RM11   | 19866268 | TCTCCTCTTCCCCGATC            | ATAGCGGGCGAGGCTTAG           |
| 8 | RM1132 | 24658736 | TCAAGGTCGACATGTTA<br>GGTATGC | AACCCTATCACCTGAGAA<br>ACATCC |
|   | RM3555 | 28314588 | TGGAAGTTTCCTGGCGA<br>TAG     | TGGTTGGACTGAAAAGTC<br>CC     |
|   | RM5556 | 4531170  | ATCTCCCTCCCTCTCCTC<br>AC     | TCCACACCTTCACAGTTG<br>AC     |
|   | CM8-6  | 7674992  | TTTAGACTTTGGTTGTGG<br>CTAAC  | TGGCTCATACTCTCAGAC<br>CA     |
|   | CM8-19 | 9392969  | TCCCGGCGTCATATCTC<br>TTC     | GACTTGTATCGCCCAACA<br>CC     |
|   | CM8-11 | 12800306 | GGCGAAGAAAACCCGG<br>TG       | GTCGAGTTTTGATCTCCG<br>GC     |
|   | CM8-13 | 14440957 | ACCACTACTGTTGAGGG<br>CTC     | GCAGCGACAGACTTGGTC           |
|   | CM8-21 | 18439042 | CAAACGGGATCATCGGT<br>CG      | CGCCTTGTCCGATTCCAAT<br>T     |
|   | CM8-15 | 22826955 | GGCAACTGTTCTCCAAT<br>TTGT    | TCTGCCTGTTACTCCACCT<br>T     |
|   | CM8-23 | 24081606 | GTAACCGTGTTTACCGC<br>CG      | TAATCTCCTCGCGCACTA<br>GG     |
| 9 | CM8-17 | 28644785 | GGGAAGTACAATGTGAG<br>GGC     | CCACGTTTTACCAAGTAA<br>CCA    |
|   | CM9-1  | 132368   | CCACTTTCACACTTGA<br>GGC      | CGGAGGTCTATGTTGGGT<br>GA     |
|   | STS    | 1800000  | CCTGGTTAGCACTACAG            | TAGTTGGCTATGTCCACA           |

|    |         |          |                             |                              |
|----|---------|----------|-----------------------------|------------------------------|
|    |         |          | CTC                         | CC                           |
|    | CM9-6   | 5086933  | TTTTGGTGTTCATCCCC<br>GG     | TTTCTCCGTTTGACACCTG<br>C     |
|    | CM9-7   | 9141690  | AGGTAGCCTCGACATTA<br>ACGT   | CAGCGTCAATCCATCGAT<br>CG     |
|    | CM9-9   | 12219870 | TCCTAGGTGATGTGGTG<br>TTGT   | AGGGGCGAGCATAAGGTA<br>AA     |
|    | CM9-10  | 13261506 | GAAGGCGTCATCCATTT<br>CCG    | AGATGCAGGAGAGGATG<br>AGC     |
|    | CM9-13  | 17254623 | TCACAACTCACAAGCCA<br>TGC    | TCGGTCTCTATCTCGGTCT<br>TT    |
|    | CM9-15  | 19117217 | ACACCATGAGTACACCA<br>ACAA   | AGCCTACTCACGGACTGT<br>TT     |
|    | STS     | 22641750 | TGACTCAAGGCATATGC<br>AGC    | TTGTCCATGCTGTTAGCCT<br>G     |
| 10 | STS     | 1100000  | GCATAGCGTGACCACCG<br>AGAA   | ACCGCACAATGATTGGGA<br>AATAC  |
|    | CM10-4  | 4321523  | AATTCCTGAGCAGAAAG<br>TTTGTT | CATTTCGAACACTAGGGT<br>CTGT   |
|    | CM10-7  | 6023938  | AGAGCTTCCATCTGTAC<br>AGC    | GGTTTGGAATATTCATGA<br>GCCCT  |
|    | CM10-9  | 11676474 | CATCACCTCACCTACC<br>CG      | CGGTGAACTCGGTCCACT           |
|    | CM10-10 | 13332668 | ACCTCCAAACCAAACAC<br>GTT    | TGGAAGGGCTTGTTCACT<br>TG     |
|    | RM5689  | 15482350 | GCACATGGTGAGACGTC<br>CTC    | AAGTCCTGTAGTAGGTCA<br>CACCG  |
|    | RM1375  | 18668850 | CTACACGCGCAAACCTCT<br>GTC   | ATGAAGGTCTAGGCTGCA<br>CC     |
|    | CM10-14 | 21113520 | TGCTCCTTACCACCAAC<br>CAT    | TCTACCAGTACCGCACCA<br>AG     |
|    | CM10-16 | 24181832 | CTCTAGGAGGAGTGGAG<br>CTG    | CTACTCATTCCGTTTCACA<br>ATGT  |
| 11 | CM11-5  | 5211088  | TTTCGTCTTCAAAAGGG<br>TTTTCA | GGAAGAAGATGAAAATG<br>ACCAGG  |
|    | STS     | 7903900  | CGCTTGAAAGGACTCCA<br>GAC    | CCATCTACTACCAAACG<br>TTCC    |
|    | CM11-7  | 9163957  | GGTCTGCTTAGATCCAA<br>AGGC   | GGAAGTGAAGTATAGATGG<br>ACAGC |
|    | CM11-12 | 12265617 | AAGCTTTAGGAGTTAGT<br>CGGTT  | CTGTCTGGCCCTGAACAA<br>AC     |
|    | CM11-32 | 13710632 | AAGATGGTGACGAACG<br>GACA    | AATGGGCCCAACTATCAT<br>GC     |
|    | CM11-39 | 15054692 | GTTCTTTCCTCTTGCCCG          | ATCAACTGAGTTTGCTGG           |

|         |          |                     |                      |
|---------|----------|---------------------|----------------------|
|         |          | TG                  | GC                   |
|         |          | ATCAGGACAGATGCCCT   | AAGTCCAGCCTCATCACG   |
| CM11-41 | 17212175 | TCA                 | AT                   |
|         |          | CCCAAATCACACACTCT   | CCGCTGCTCTTATCTCTCC  |
| CM11-21 | 22085028 | TCGT                | T                    |
|         |          | CGTCTTGTTAGCTGCCG   | GGCTTCTAAAACGGTGCT   |
| CM11-29 | 24203520 | AAT                 | CC                   |
|         |          | GGGCAAATAAACTGTGT   | CAAGGGGAAAACGGCCAT   |
| CM11-23 | 25500867 | CACC                | C                    |
|         |          | GCAGGCATGGACAAACT   | CTGATGAGTTGGCATATG   |
| CM11-37 | 2966139  | TCA                 | TCCC                 |
|         |          | ATGGACCATGGCTCAGC   | GCACCGCAGCACCAGATG   |
| 12      | CM12-4   | AG                  |                      |
|         |          | GCCCAGCTACAAATACC   | TGGTTGTCTTTCCTTATCC  |
| CM12-6  | 6061157  | CCA                 | GGA                  |
|         |          | GTGAATGGTCAAGTGAC   | ACACAACATGTTCCCTCC   |
| RM101   | 7782800  | TTAGGTGGC           | CATGC                |
|         |          | GTATCCTTTCTCGCAATC  | GTGGCCCCGAACCTGTATA  |
| RM1337  | 11058050 | GC                  | AC                   |
|         |          | ATTTCCGCCACAGATTT   | GGGGAAGAGATTGAGCCA   |
| CM12-11 | 14353137 | GCC                 | GA                   |
|         |          | AGTTGAGGTATAAGGCC   | TGGCCATGTCACTGCTGA   |
| CM12-15 | 18412824 | CCG                 | TA                   |
|         |          | GGAGTGGAAGACATCA    | AGAAGGCTCGATTGTTGC   |
| SSR     | 20654550 | GGGA                | AT                   |
|         |          | CACTTTGTGTCTGTGCTTG | CTAGCCTAGACACGAGAC   |
| CM12-27 | 23723600 | GG                  | GG                   |
|         |          | ATCACCGTTTGCATTCA   | CGTTTGCCCTGTTTGTGTTG |
| CM12-28 | 25594702 | GGC                 | T                    |

---
